# Supplementary material
Source: publisher figshare collection journal article supplement (https://aacr.figshare.com/articles/dataset/_/22488878)
Supplement: Supplementary file 1 [file 39940496]

| <u>Donor ID</u> | <u>Metastatic Disease (Mucinous Carcinomatosis Peritonei)</u> | <u>Prior HIPEC</u> | <u>Viability (7 Days)</u> | <u>Cellular Composition</u> | <u>Immunotyping</u> | <u>CTG</u> | <u>TUNEL</u> | <u>EDU</u> | <u>Morphology Analysis</u> | <u>Histology</u> | <u>Ca2+ Imaging</u> | <u>TAK Immunotyping</u> |
|-----------------|---------------------------------------------------------------|--------------------|---------------------------|-----------------------------|---------------------|------------|--------------|------------|----------------------------|------------------|---------------------|-------------------------|
| 0.21            | Low grade (MCP)                                               | No                 |                           |                             | X                   |            |              |            |                            | X                |                     |                         |
| 0.32            | Invasive mucinous adenocarcinoma                              | No                 | X                         |                             | X                   |            |              |            |                            | X                |                     |                         |
| 0.35            | Moderately differentiated mucinous adenocarcinoma             | No                 |                           | X                           | X                   |            |              | X          |                            |                  | X                   | X                       |
| 0.37            | Invasive mucinous adenocarcinoma                              | No                 |                           |                             | X                   |            |              |            |                            | X                |                     |                         |
| 0.38            | Low grade (MCP)                                               | No                 |                           |                             |                     |            |              |            |                            | X                |                     | X                       |
| 0.39            | Low grade (MCP)                                               | No                 |                           | X                           | X                   | X          |              |            |                            |                  | X                   | X                       |
| 284             | Invasive mucinous adenocarcinoma                              | No                 |                           | X                           | X                   | X          |              |            |                            | X                |                     |                         |
| 315             | Low grade (MCP)                                               | No                 |                           |                             | X                   |            |              |            |                            | X                |                     | X                       |
| 266             | Low grade (MCP)                                               | No                 | X                         |                             |                     |            |              |            |                            |                  |                     |                         |
| 0.22            | Moderately differentiated mucinous adenocarcinoma             | No                 | X                         | X                           |                     |            |              |            |                            |                  |                     |                         |
| 0.26            | Moderately differentiated mucinous adenocarcinoma             | No                 | X                         |                             |                     |            |              |            |                            |                  |                     |                         |
| 302             | Invasive mucinous adenocarcinoma                              | No                 |                           |                             |                     | X          |              | X          |                            |                  |                     |                         |
| 334             | Low grade (MCP)                                               | No                 |                           |                             |                     | X          | X            | X          | X                          |                  |                     |                         |
| 0.28            | Invasive mucinous adenocarcinoma                              | No                 | X                         |                             |                     |            |              |            |                            |                  |                     |                         |
| 229             | Low grade (MCP)                                               | Yes                |                           |                             |                     | X          |              |            | X                          |                  |                     | X                       |
| 337             | Low grade (MCP)                                               | No                 |                           | X                           | X                   |            | X            | X          | X                          |                  |                     |                         |
| 338             | Low grade (MCP)                                               | No                 |                           |                             |                     |            |              |            | X                          |                  |                     |                         |
| 339             | Metastatic Adenocarcinoma                                     | No                 |                           | X                           |                     |            | X            | X          |                            |                  |                     | X                       |
| 342             | Low grade (MCP)                                               | Yes                |                           |                             |                     | X          |              |            |                            |                  |                     |                         |
